# Supplementary material for: Surface catalytic effect of Ag nanoparticles and influence of dissolved oxygen on photocatalytic reduction of nitrate
Source: Royal Society of Chemistry journal article supplement (doi:10.1039/d5ra00782h), 2025-01-01
Supplement: d5ra00782h1.pdf [file d5ra00782h1.pdf]

## Supporting Information

### Surface catalytic effect of Ag nanoparticles and influence of dissolved oxygen for photocatalytic reduction of nitrate

Bin Huang,<sup>a,b</sup> Wei Liu,<sup>b,c</sup> Kun Chao,<sup>b,d</sup> Dongran Wang,<sup>b,e</sup> Pengxiang Wang,<sup>b,e</sup> Tengfeng Xie,<sup>f</sup> Fangming Han,<sup>b,e</sup> \* Yan Mi,<sup>a\*</sup> Haibin Tang<sup>b,e</sup> \* Guowen Meng<sup>b,e</sup>

#### Author affiliations

<sup>a</sup> Guangxi Key Laboratory of Chemistry and Engineering of Forest Products, Guangxi Minzu University, Nanning, 530006, P. R. China.

<sup>b</sup> Key Laboratory of Materials Physics, and Anhui Key Laboratory of Nanomaterials and Nanotechnology, Institute of Solid State Physics, HFIPS, Chinese Academy of Sciences, 350 Shushanhu Road, Hefei, Anhui 230031, P. R. China.

<sup>c</sup> Institutes of Physical Science and Information Technology, and School of Materials Science and Engineering, Anhui University, Hefei 230601, P. R. China.

<sup>d</sup> School of Advanced Materials and Nanotechnology, Xidian University, Xi'an, 710126 P. R. China.

<sup>e</sup> University of Science and Technology of China, 96 Jinzhai Road, Hefei, Anhui 230026, P. R. China.

<sup>f</sup> Institute of Physical Chemistry, College of Chemistry, Jilin University, Changchun 130012, PR China

Corresponding authors: hbtang@issp.ac.cn (H. Tang); miyan@gxmzu.edu.cn (Y. Mi); fmhan@issp.ac.cn (F. Han)

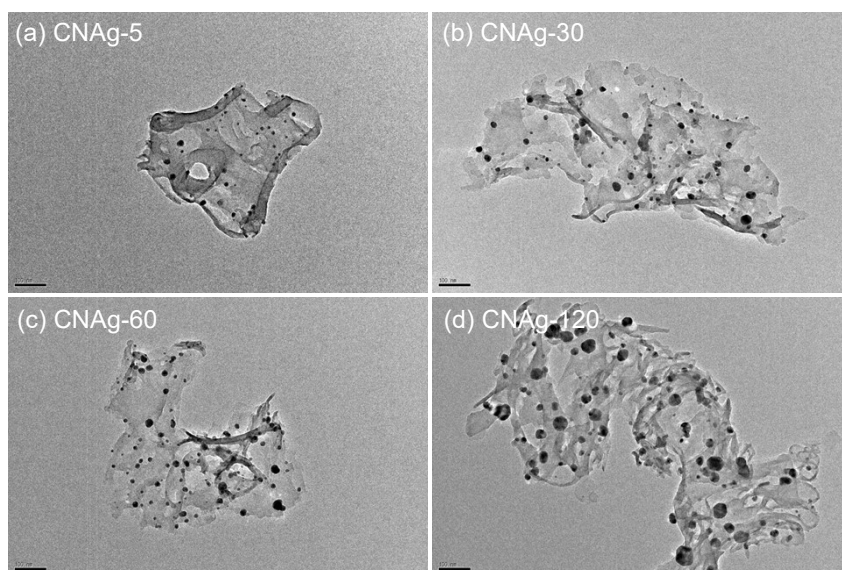

**Fig.S1** TEM images of the CNAg samples with different photodeposition durations.

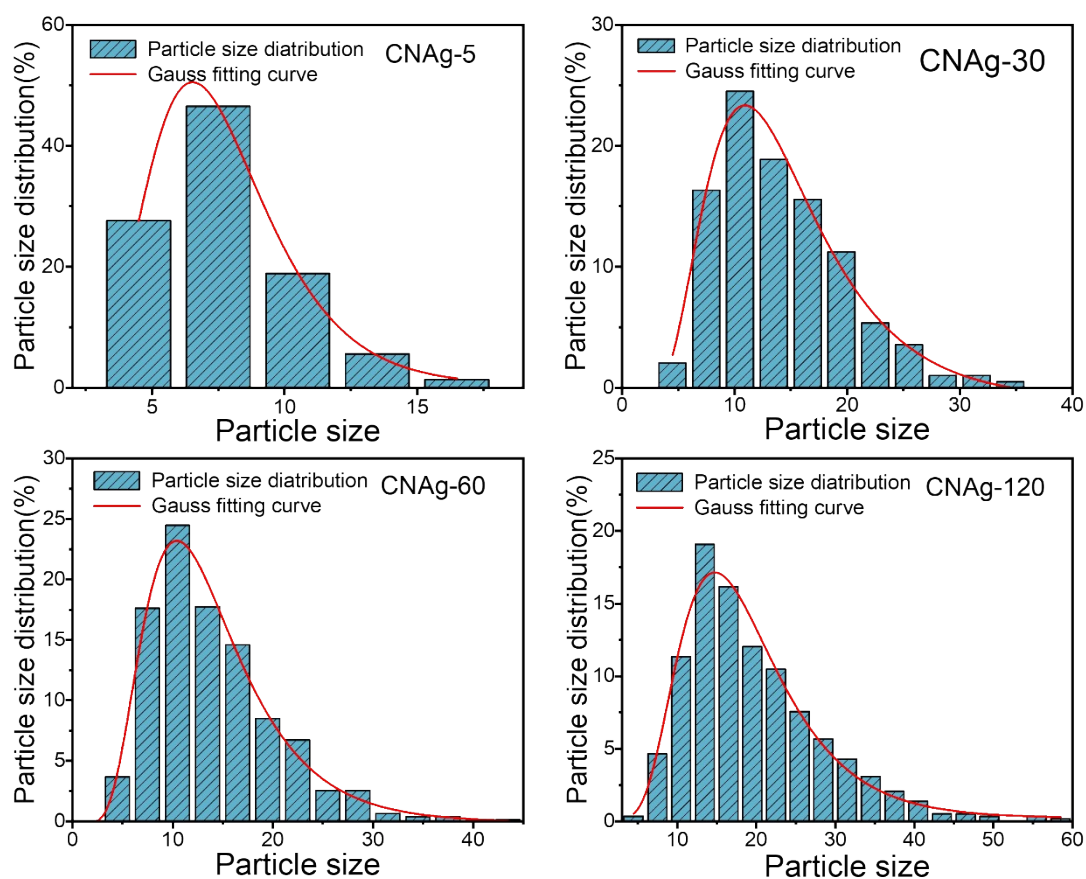

**Fig.S2** Statistical curve of the particle size of different samples.

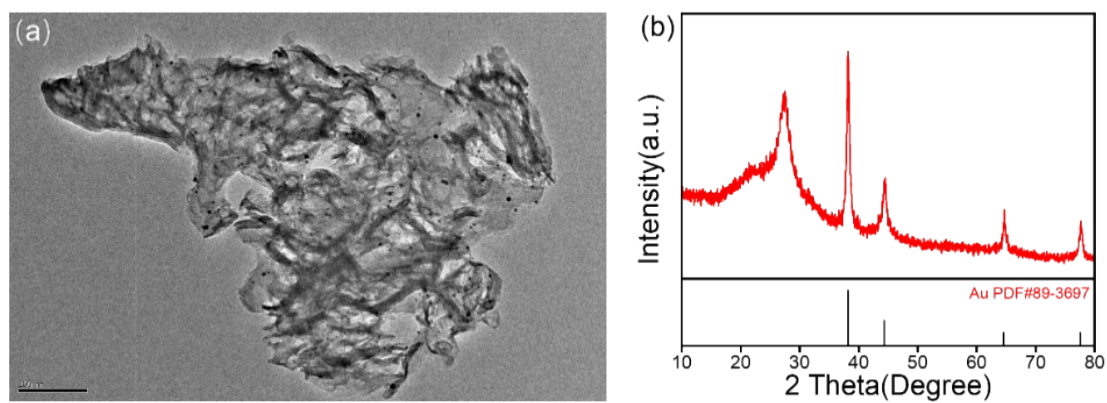

**Fig.S3** (a) XRD pattern and (b) TEM image of the CNAu sample.

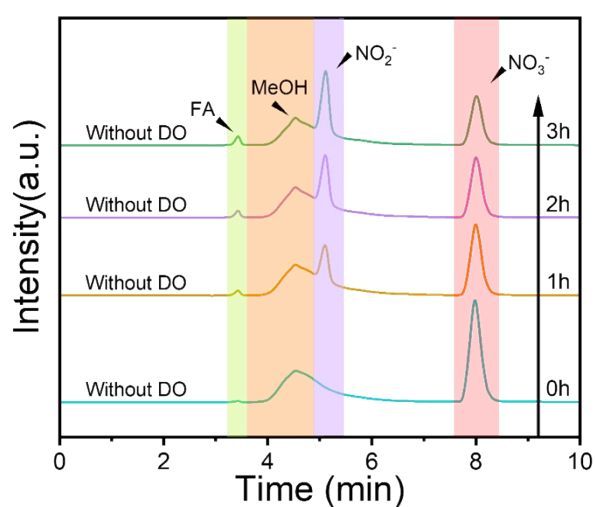

**Fig.S4** Ion chromatogram measurement of the photocatalytic system with CNAg as photocatalyst without dissolved oxygen.

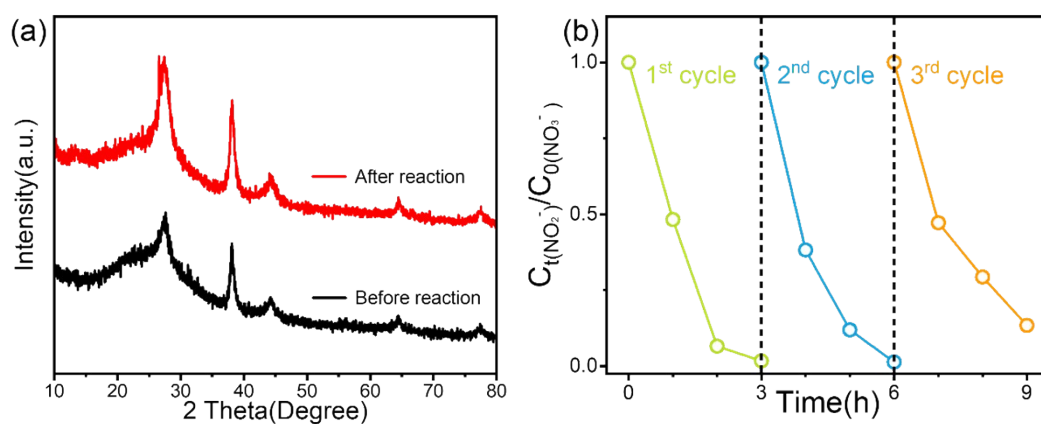

**Fig.S5** (a) The XRD patterns before and after the photocatalytic reaction (b) Cyclic test performance of the CNAg-30 composite samples

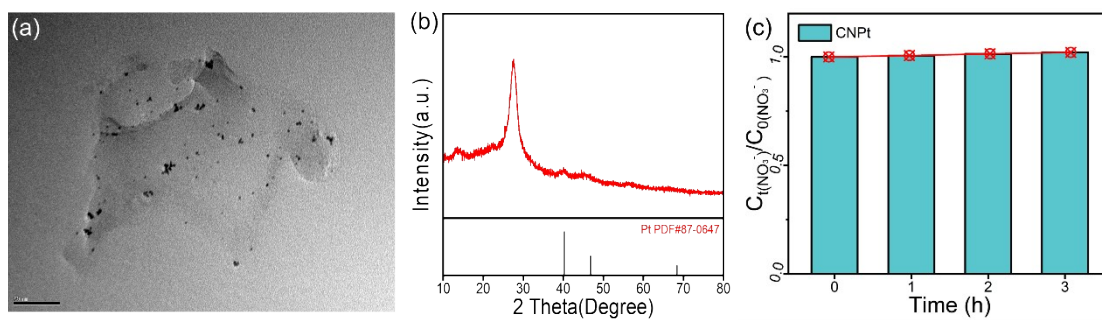

**Fig.S6** (a)TEM, (b)XRD pattern and (c) photocatalytic performance of the CNPt sample.

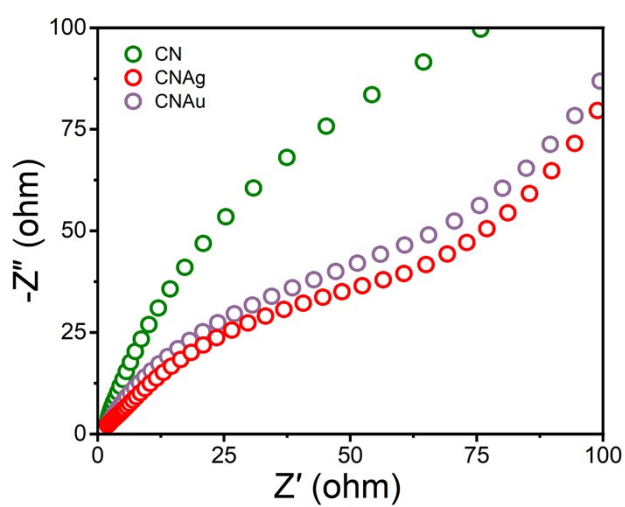

**Fig.S7** Nyquist plots of the as-prepared different samples.
